# Supplementary material for: ­Characterization of pyruvate kinase from the anoxia tolerant turtle, Trachemys scripta elegans: a potential role for enzyme methylation during metabolic rate depression
Source: PeerJ. 2018 Jun 8;6:e4918. doi: 10.7717/peerj.4918 (PMC5995096; doi:10.7717/peerj.4918)
Supplement: Supplemental Information 1 [file peerj-06-4918-s001.xlsx]

## Sheet: Muscle Stats
Lactate I50				Control			Km PEP pH 6.6
	Anoxia			I50					Anoxia			Control
	178.347			26.8758					0.0529			0.03229
	179.151			36.139					0.0193			0.023715
	172.89			27.3994					0.0546			0.04215
	194.281			37.0363					0.0609			0.0179
	158.616			38.2811					0.07529			0.02079
	182.266			40.4807					0.07618			0.03558
AVG	177.592		Average	34.3687				AVG	0.0565283		Average	0.0287375
stdev	11.7095		stdev	5.79013				stdev	0.0207852		stdev	0.00943583
SEM	4.7804		SEM	2.36381				SEM	0.00848554		SEM	0.00385216
%error	2.69179		%error	6.8778				%error	15.0111		%error	13.4047
		Ttest	1.42708e-08							Ttest	0.020531
I50 KCL							Urea I50		Anoxia			Control
	Anoxia			Control					1.39127			1.56426
	0.4745			0.454836					1.3634			1.93368
	0.50661			0.5819					1.56927			2.1825
	0.44169			0.5023					1.54679			1.98687
	0.5754			0.5721					1.46728			1.87145
	0.49158			0.58581					1.41309			1.3348
	0.55749			0.57256				AVG	1.45852		Average	1.81226
AVG	0.507878		Average	0.544918				stdev	0.0845791		stdev	0.308313
stdev	0.0505623		stdev	0.053803				SEM	0.0345293		SEM	0.125868
SEM	0.020642		SEM	0.021965				%error	2.36743		%error	6.94538
%error	4.06436		%error	4.03088						Ttest	0.0366341
		Ttest	0.247377
ATP I50
	Anoxia			Control			ADP KM		Km			Km
	8.3027			8.33104					0.2814			0.2227
	7.8949			12.0113					0.3052			0.20669
	7.7539			12.9023					0.2341			0.203845
	8.0015			11.9703					0.2883			0.18516
	7.27908			12.2533					0.3068			0.19278
	7.92769			12.281					0.2844			0.19509
AVG	7.85996		Average	11.6249				AVG	0.283367		Average	0.201044
stdev	0.337796		stdev	1.64774				stdev	0.0263905		stdev	0.013151
SEM	0.137905		SEM	0.672687				SEM	0.0107739		SEM	0.00536889
%error	1.75452		%error	5.78662				%error	3.8021		%error	2.6705
		Ttest	0.00213635							Ttest	0.000197323
Km PEP PH 7.2
	Km Values			Km
	0.0526			0.01112
	0.0602			0.01005
	0.0546			0.009874
	0.0585			0.00923
	0.0825			0.013306
	0.0585			0.014991
AVG	0.06115		Average	0.0114285
stdev	0.0108331		stdev	0.00225662
SEM	0.00442257		SEM	0.000921262
%error	7.23234		%error	8.06109
		Ttest	6.41419e-05

## Sheet: Liver Stats
	Km, PEP, pH 6.6 (mM)		0.000132407						Km, PEP, pH 7.2 (mM)			4.88314e-07
		Control	anoxic							Control	Stress
		0.0428178	0.0791007							0.245485	0.521158
		0.0520196	0.0847526							0.335254	0.559467
		0.053936	0.0810009							0.333314	0.541647
		0.050494	0.104081							0.286623	0.529855
		0.0580025	0.10727							0.332508	0.584723
			0.0961992							0.315998
	avg	0.051454	0.0920674
	SD	0.00558723	0.0121378						avg	0.308197	0.54737
	SEM	0.00249869	0.00495522						SD	0.0358136	0.0253386
									SEM	0.0146208	0.0113318
	Km, ADP, pH 7.2 (mM)		0.212997
		Control	Stress						I50, urea, pH 7.2 (M)			0.00166717
		0.121508	0.120968
		0.101309	0.119304							Control	stress
		0.14222	0.137796							1.46163	2.08999
		0.10285	0.133346							1.36004	1.79445
			0.137524							1.40246	2.01291
			0.145073							1.42331	2.03119
	avg	0.116972	0.132335						avg	1.41186	1.98213
	SD	0.0191729	0.0101886						SD	0.042355	0.129373
	SEM	0.00958644	0.0041595						SEM	0.0211775	0.0646863
										I50, lactate, pH 7.2 (mM)			4.22193e-05
										control	stress i50
	I50, L-alanine, pH 7.2 (mM)			0.00186618						208.049	138.228
										202.39	130.965
										175.751	138.185
		Control	Stress							185.513	125.756
		0.091303	0.0143825							180.359	134.21
		0.0900273	0.0103772							174.24	120.895
		0.143192	0.0115122						avg	187.717	131.373
		0.123313	0.0196205						SD	14.2302	6.97063
		0.0722522							SEM	5.80947	2.84575
	avg	0.104018	0.0139731
	SD	0.0286067	0.00412502
	SEM	0.0127933	0.00206251
										I50, KCl, pH 7.2 (M)			0.368221
		I50, ATP, pH 7.2 (mM)			0.567768					control		stress
										0.442075		0.449668
			Control	stress						0.391616		0.457392
			2.88328	3.01529						0.425805		0.460531
			3.27765	2.98031						0.435936		0.377052
			1.8664	2.53349						0.45788		0.327129
			2.3427	2.21991						0.442658		0.384104
			2.8377						avg	0.432662		0.409313
			1.81354						SD	0.0226583		0.0547611
		avg	2.50354	2.68725					SEM	0.0092502		0.0223561
		SD	0.593806	0.381026
		SEM	0.24242	0.190513
										Ka, FBP, pH 7.2 (mM)				0.0346467
										FBP fold activation, pH 7.2				0.0502245
	I50, ATP + FBP, pH 7.2 (mM)			0.0382673						Control				Stress
										Ka	Activation	Fold			Ka	Activation	Fold
		Control	stress							0.0193655	0.956752	1.95675			0.00330319	0.793047	1.79305
		1.47831	0.8556							0.0500584	0.741225	1.74122			0.00352535	1.06496	2.06496
		2.233	0.929051							0.0272901	0.817931	1.81793			0.00272034	0.792638	1.79264
		1.61695	1.00995							0.020765	0.76952	1.76952			0.00266379	0.968124	1.96812
		2.52072	1.68373								0.572008	1.57201			0.00339724	1.24211	2.24211
															0.0035087	1.04454	2.04454
									avg	0.0293698	0.771487	1.77149		avg	0.00318643	0.984237	1.98424
	avg	1.96225	1.11958						SD	0.0142182	0.138917	0.138917		SD	0.000391712	0.173307	0.173307
	SD	0.496194	0.381344						SEM	0.0071091	0.0621256	0.0621256		SEM	0.000159916	0.0707521	0.0707521
	SEM	0.248097	0.190672
